# Supplementary material for: Stochastic modeling of flow and conservative transport in threedimensionaldiscrete fracture networks
Source: Copernicus journal article supplement (doi:10.5194/hess-2018-397), 2018-08-21
Supplement: Supplementary file [file hess-2018-397-RC1-supplement.pdf]

## Comments to the author

1)

### 3.1 Transport model verification by using HYDROGEOCHEM model

*'The boundary conditions along the boundaries parallel to the flow direction are specified to be no-flow boundary conditions, except for the cross-shaped fracture network case, where a slightly upward flow along the vertical fracture is introduced'*

Please explain better the upward flow. Is it a constant head value of 9 m as shown by the figure?

2)

### 3.2 Transport model verification by using analytical solution

On the basis of which criteria did you choose the dispersivities in the HYDROGEOCHEM model and the analytical solution?

3)

### 4.1 Transport model verification

*'The longitudinal dispersion is relatively obvious as compared to the transverse dispersion'*. Explain this sentence.

4)

### Figure 9

Please define in a careful way the parameters  $P_{21}$  and  $P_{32}$  as well as  $P_{21}^e$   $P_{32}^e$   $P_{32}^t$  as the notations are quite misleading.

How did you calculate those parameters and do they differentiate among each other? And also better interpret the graph on the basis of those parameters and others such as fracture hydraulic conductivity and equivalent hydraulic conductivity. The discussion of graph 9d is not clear, please provide a more accurate interpretation of the results.

5)

## **5 Conclusions**

The Conclusion is a mere summary of the obtained results. Rewrite the conclusion adding a more extensive interpretation and discussion of the results, including clarifications on the novelty of the proposed approach and how it would provide a benefit to the scientific community.
